# Supplementary material for: Assessment of Physician Priorities in Delivery of Preventive Care
Source: PubMed Central journal article supplement (PMC8103855; doi:10.1001/jamanetworkopen.2020.11677), 2020-07-27
Supplement: jamanetwopen-3-e2011677-s001.pdf [file jamanetwopen-3-e2011677-s001.pdf]

## Supplementary Online Content

Zhang JJ, Rothberg MB, Misra-Hebert AD, Gupta NM, Taksler GB. Assessment of physician priorities in delivery of preventive care. *JAMA Netw Open.* 2020;3(7):e2011677.  
doi:10.1001/jamanetworkopen.2020.11677

### **eAppendix.** Survey

**eFigure 1.** Number of Preventive Services Physicians Were Likely to Discuss ( $\geq 4$  of 5) During a 40-Minute or 20-Minute Office Visit

**eFigure 2.** Most Common Combinations of the Top 3 Preventive Recommendations to Address in the Current Visit (Chosen by  $>5\%$  of Physicians)

This supplementary material has been provided by the authors to give readers additional information about their work.

## eAppendix. Survey

Survey Version A (40-minute visit then 20-minute visit for a minor, acute illness with 5 minutes left over)

### Thank you for your time.

**You are being invited to take part in a research study by the Cleveland Clinic.**

**Through Survey Monkey (internet-based software), the Cleveland Clinic is surveying eligible physicians to better understand provider attitudes toward preventive care. By taking this survey, you can help researchers understand differences in provider opinions about disease prevention.**

**What are the requirements and time commitment to participate? This study involves a survey that will take about 15 minutes.**

**What are the benefits of taking part in this study?**

**You will experience no direct benefit from participating in the research. The information from this study may improve knowledge about provider attitudes toward preventive care.**

**Are there any risks to you participating in this study?**

**This is minimal risk research. You may experience anxiety or discomfort from answering survey questions. There is minimal risk to the confidentiality of your information. Your name will NOT be linked to your responses.**

**Do I have to participate in the research?**

**Your participation is strictly voluntary. If you choose to complete the survey, you can stop at any time.**

**Will my privacy and confidentiality be protected?**

**All of your answers to this survey will be confidential. Survey Monkey will collect and store your answers, and send them to the Cleveland Clinic.**

**Will I be compensated for my time?**

**Yes, if you complete the survey, you will be provided with a \$20 gift card. Per Cleveland Clinic Tax Department guidelines, this is considered taxable wages and will be reported on your pay stub. For this purpose only, your name and employee ID will be provided to the payroll department.**

**How do I indicate that I want to participate in the research? You agree to participate by completing this survey.**

**Who do I contact if I have questions about the research?**

**If you have any questions about this survey, you may contact the investigative team at (216) 444- 4590. Or, if you have questions about your rights as a research participant, call the Cleveland Clinic Institutional Review Board at (216) 444-2924.**

**Your help means a lot to us. We thank you again for taking the time to complete this survey.**

\* Do you agree to participate in this survey?

YES, I AGREE TO PARTICIPATE BY COMPLETING THIS SURVEY NO, I

DO NOT AGREE TO PARTICIPATE

This survey consists of 2 sections. First, we will ask your views on 2 hypothetical patients. Then, we will ask you some questions about preventive care in your practice.

## **Patient Scenarios**

### **Patient #1**

**Please consider the following new patient, who presents for a 40- minute visit. She last saw a doctor 6 months ago and brings her labs from that visit.**

**50 y o white female, BMI 35, current smoker (30 pack-years), type II diabetes on metformin 500 mg BID. Not up-to-date with any cancer screenings. Recently received a flu shot at her local pharmacy.**

**BP 150/90**

**Labs (HbA1c 9%, TC 280, LDL 150, HDL 40)**

**Family history (1 first-degree relative diagnosed with breast cancer at age 50)**

\* 1. Sometimes, because of time constraints, important services are not discussed. In your opinion, how likely would you be to discuss these services with this patient **at this visit?**

|                              | Definitely <b>not</b> discuss<br>this visit |                       |                       |                       | Definitely discuss this<br>visit |
|------------------------------|---------------------------------------------|-----------------------|-----------------------|-----------------------|----------------------------------|
| Eat a healthy diet           | <input type="radio"/>                       | <input type="radio"/> | <input type="radio"/> | <input type="radio"/> | <input type="radio"/>            |
| Exercise regularly           | <input type="radio"/>                       | <input type="radio"/> | <input type="radio"/> | <input type="radio"/> | <input type="radio"/>            |
| Glycemic control             | <input type="radio"/>                       | <input type="radio"/> | <input type="radio"/> | <input type="radio"/> | <input type="radio"/>            |
| <input type="radio"/>        |                                             |                       |                       |                       |                                  |
| Lose weight                  | <input type="radio"/>                       | <input type="radio"/> | <input type="radio"/> | <input type="radio"/> | <input type="radio"/>            |
| <input type="radio"/>        |                                             |                       |                       |                       |                                  |
| Lower blood pressure         | <input type="radio"/>                       | <input type="radio"/> | <input type="radio"/> | <input type="radio"/> | <input type="radio"/>            |
| Lower cholesterol            | <input type="radio"/>                       | <input type="radio"/> | <input type="radio"/> | <input type="radio"/> | <input type="radio"/>            |
| Screen for breast cancer     | <input type="radio"/>                       | <input type="radio"/> | <input type="radio"/> | <input type="radio"/> | <input type="radio"/>            |
| <input type="radio"/>        |                                             |                       |                       |                       |                                  |
| Screen for cervical cancer   | <input type="radio"/>                       | <input type="radio"/> | <input type="radio"/> | <input type="radio"/> | <input type="radio"/>            |
| Screen for colorectal cancer | <input type="radio"/>                       | <input type="radio"/> | <input type="radio"/> | <input type="radio"/> | <input type="radio"/>            |
| Screen for depression        | <input type="radio"/>                       | <input type="radio"/> | <input type="radio"/> | <input type="radio"/> | <input type="radio"/>            |
| Screen for lung cancer       | <input type="radio"/>                       | <input type="radio"/> | <input type="radio"/> | <input type="radio"/> | <input type="radio"/>            |
| <input type="radio"/>        | <input type="radio"/>                       | <input type="radio"/> | <input type="radio"/> | <input type="radio"/> | <input type="radio"/>            |
| Take aspirin daily           | <input type="radio"/>                       | <input type="radio"/> | <input type="radio"/> | <input type="radio"/> | <input type="radio"/>            |
| Quit smoking                 | <input type="radio"/>                       | <input type="radio"/> | <input type="radio"/> | <input type="radio"/> | <input type="radio"/>            |

\* 2. Please consider the preventive services listed below. In your opinion, which are the 3 most important services to address **in this visit?** (*Please select 3*)

|                              |                       |
|------------------------------|-----------------------|
| Eat a healthy diet           | <input type="radio"/> |
| Exercise regularly           | <input type="radio"/> |
| Glycemic control             | <input type="radio"/> |
| Lose weight                  | <input type="radio"/> |
| Lower blood pressure         | <input type="radio"/> |
| Lower cholesterol            | <input type="radio"/> |
| Screen for breast cancer     | <input type="radio"/> |
| Screen for cervical cancer   | <input type="radio"/> |
| Screen for depression        | <input type="radio"/> |
| Screen for colorectal cancer | <input type="radio"/> |
| Screen for lung cancer       | <input type="radio"/> |
| Take aspirin daily           | <input type="radio"/> |
| Quit smoking                 | <input type="radio"/> |

\* 3. Please rank these services in order of importance **for this visit**.

|                      |                              |
|----------------------|------------------------------|
| <input type="text"/> | Eat a healthy diet           |
| <input type="text"/> | Exercise regularly           |
| <input type="text"/> | Glycemic control             |
| <input type="text"/> | Lose weight                  |
| <input type="text"/> | Lower blood pressure         |
| <input type="text"/> | Lower cholesterol            |
| <input type="text"/> | Screen for breast cancer     |
| <input type="text"/> | Screen for cervical cancer   |
| <input type="text"/> | Screen for colorectal cancer |
| <input type="text"/> | Screen for depression        |
| <input type="text"/> | Screen for lung cancer       |
| <input type="text"/> | Take aspirin daily           |
| <input type="text"/> | Quit smoking                 |



## Patient #1

**Now, suppose the same new patient presents for a 20-minute visit for a minor, acute illness. You have 5 minutes left over. As a reminder, she last saw a doctor 6 months ago and brings her labs from that visit.**

**50 y o white female, BMI 35, current smoker (30 pack-years), type II diabetes on metformin 500 mg BID. Not up-to-date with any cancer screenings. Recently received a flu shot at her local pharmacy.**

**BP 150/90**

**Labs (HbA1c 9%, TC 280, LDL 150, HDL 40)**

**Family history (1 first-degree relative diagnosed with breast cancer at age 50)**

\* 1. Still considering the same patient, how likely would you be to discuss these services at this visit?

|                              | Definitely <b>not</b> discuss this visit |                       |                       |                       | Definitely discuss this visit |                       |
|------------------------------|------------------------------------------|-----------------------|-----------------------|-----------------------|-------------------------------|-----------------------|
| Eat a healthy diet           | <input type="radio"/>                    | <input type="radio"/> | <input type="radio"/> | <input type="radio"/> | <input type="radio"/>         | <input type="radio"/> |
| Exercise regularly           | <input type="radio"/>                    | <input type="radio"/> | <input type="radio"/> | <input type="radio"/> | <input type="radio"/>         | <input type="radio"/> |
| Glycemic control             | <input type="radio"/>                    | <input type="radio"/> | <input type="radio"/> | <input type="radio"/> | <input type="radio"/>         | <input type="radio"/> |
| <input type="radio"/>        |                                          |                       |                       |                       |                               |                       |
| Lose weight                  | <input type="radio"/>                    | <input type="radio"/> | <input type="radio"/> | <input type="radio"/> | <input type="radio"/>         | <input type="radio"/> |
| <input type="radio"/>        |                                          |                       |                       |                       |                               |                       |
| Lower blood pressure         | <input type="radio"/>                    | <input type="radio"/> | <input type="radio"/> | <input type="radio"/> | <input type="radio"/>         | <input type="radio"/> |
| Lower cholesterol            | <input type="radio"/>                    | <input type="radio"/> | <input type="radio"/> | <input type="radio"/> | <input type="radio"/>         | <input type="radio"/> |
| Screen for breast cancer     | <input type="radio"/>                    | <input type="radio"/> | <input type="radio"/> | <input type="radio"/> | <input type="radio"/>         | <input type="radio"/> |
| <input type="radio"/>        |                                          |                       |                       |                       |                               |                       |
| Screen for cervical cancer   | <input type="radio"/>                    | <input type="radio"/> | <input type="radio"/> | <input type="radio"/> | <input type="radio"/>         | <input type="radio"/> |
| Screen for colorectal cancer | <input type="radio"/>                    | <input type="radio"/> | <input type="radio"/> | <input type="radio"/> | <input type="radio"/>         | <input type="radio"/> |
| Screen for depression        | <input type="radio"/>                    | <input type="radio"/> | <input type="radio"/> | <input type="radio"/> | <input type="radio"/>         | <input type="radio"/> |
| Screen for lung cancer       | <input type="radio"/>                    | <input type="radio"/> | <input type="radio"/> | <input type="radio"/> | <input type="radio"/>         | <input type="radio"/> |
| <input type="radio"/>        |                                          |                       |                       |                       |                               |                       |
| Take aspirin daily           | <input type="radio"/>                    | <input type="radio"/> | <input type="radio"/> | <input type="radio"/> | <input type="radio"/>         | <input type="radio"/> |
| Quit smoking                 | <input type="radio"/>                    | <input type="radio"/> | <input type="radio"/> | <input type="radio"/> | <input type="radio"/>         | <input type="radio"/> |

\* 2. Still considering a visit with **5 minutes left over**, in your opinion, which are the 3 most important services to address **in this visit?** (*Please select 3*)

|                              |                       |
|------------------------------|-----------------------|
| Eat a healthy diet           | <input type="radio"/> |
| Exercise regularly           | <input type="radio"/> |
| Glycemic control             | <input type="radio"/> |
| Lose weight                  | <input type="radio"/> |
| Lower blood pressure         | <input type="radio"/> |
| Lower cholesterol            | <input type="radio"/> |
| Screen for breast cancer     | <input type="radio"/> |
| Screen for cervical cancer   | <input type="radio"/> |
| Screen for depression        | <input type="radio"/> |
| Screen for colorectal cancer | <input type="radio"/> |
| Screen for lung cancer       | <input type="radio"/> |
| Take aspirin daily           | <input type="radio"/> |
| Quit smoking                 | <input type="radio"/> |

\* 3. Still considering a visit with **5 minutes left over**, please rank these services in order of importance **for this visit**.

|                      |                              |
|----------------------|------------------------------|
| <input type="text"/> | Eat a healthy diet           |
| <input type="text"/> | Exercise regularly           |
| <input type="text"/> | Glycemic control             |
| <input type="text"/> | Lose weight                  |
| <input type="text"/> | Lower blood pressure         |
| <input type="text"/> | Lower cholesterol            |
| <input type="text"/> | Screen for breast cancer     |
| <input type="text"/> | Screen for cervical cancer   |
| <input type="text"/> | Screen for colorectal cancer |
| <input type="text"/> | Screen for depression        |
| <input type="text"/> | Screen for lung cancer       |
| <input type="text"/> | Take aspirin daily           |
| <input type="text"/> | Quit smoking                 |

## Patient #2

**Next, please consider the following new patient, who presents for a 40-minute visit. He last saw a doctor 2 years ago and brings his labs from that visit.**

**45 y o black male, BMI 35, current smoker (30 pack-years), no significant past medical history. No current medications, never had any cancer screenings. Recently received a flu shot at his local pharmacy.**

**BP 150/90**

**Labs (TC 280, LDL 150, HDL 40)**

**Family history (1 first-degree relative diagnosed with colorectal cancer at age 50)**

\* 1. Sometimes, because of time constraints, important services are not discussed. In your opinion, how likely would you be to discuss these services with this patient **at this visit?**

|                              | Definitely <b>not</b> discuss<br>this visit |                       |                       | Definitely discuss this<br>visit |                       |                       |
|------------------------------|---------------------------------------------|-----------------------|-----------------------|----------------------------------|-----------------------|-----------------------|
| Eat a healthy diet           | <input type="radio"/>                       | <input type="radio"/> | <input type="radio"/> | <input type="radio"/>            | <input type="radio"/> | <input type="radio"/> |
| Exercise regularly           | <input type="radio"/>                       | <input type="radio"/> | <input type="radio"/> | <input type="radio"/>            | <input type="radio"/> | <input type="radio"/> |
| Lose weight                  | <input type="radio"/>                       | <input type="radio"/> | <input type="radio"/> | <input type="radio"/>            | <input type="radio"/> | <input type="radio"/> |
| <input type="radio"/>        |                                             |                       |                       |                                  |                       |                       |
| Lower blood pressure         | <input type="radio"/>                       | <input type="radio"/> | <input type="radio"/> | <input type="radio"/>            | <input type="radio"/> | <input type="radio"/> |
| <input type="radio"/>        |                                             |                       |                       |                                  |                       |                       |
| Lower cholesterol            | <input type="radio"/>                       | <input type="radio"/> | <input type="radio"/> | <input type="radio"/>            | <input type="radio"/> | <input type="radio"/> |
| Screen for colorectal cancer | <input type="radio"/>                       | <input type="radio"/> | <input type="radio"/> | <input type="radio"/>            | <input type="radio"/> | <input type="radio"/> |
| Screen for depression        | <input type="radio"/>                       | <input type="radio"/> | <input type="radio"/> | <input type="radio"/>            | <input type="radio"/> | <input type="radio"/> |
| Screen for diabetes          | <input type="radio"/>                       | <input type="radio"/> | <input type="radio"/> | <input type="radio"/>            | <input type="radio"/> | <input type="radio"/> |
| <input type="radio"/>        |                                             |                       |                       |                                  |                       |                       |
| Screen for lung cancer       | <input type="radio"/>                       | <input type="radio"/> | <input type="radio"/> | <input type="radio"/>            | <input type="radio"/> | <input type="radio"/> |
| Screen for prostate cancer   | <input type="radio"/>                       | <input type="radio"/> | <input type="radio"/> | <input type="radio"/>            | <input type="radio"/> | <input type="radio"/> |
| Quit smoking                 | <input type="radio"/>                       | <input type="radio"/> | <input type="radio"/> | <input type="radio"/>            | <input type="radio"/> | <input type="radio"/> |
| Take aspirin daily           | <input type="radio"/>                       | <input type="radio"/> | <input type="radio"/> | <input type="radio"/>            | <input type="radio"/> | <input type="radio"/> |
|                              | <input type="radio"/>                       | <input type="radio"/> | <input type="radio"/> | <input type="radio"/>            | <input type="radio"/> | <input type="radio"/> |

\* 2. Still considering a **40-minute** visit, in your opinion, which are the 3 most important services to address **in this visit**?  
(Please select 3)

Eat a healthy diet

Exercise regularly

Lose weight

Lower blood pressure

Lower cholesterol

Screen for colorectal  
cancer

Screen for depression

Screen for diabetes

Screen for lung cancer

Screen for prostate cancer

Take aspirin daily

Quit smoking

\* 3. Still considering a **40-minute** visit, please rank these services in order of importance **for this visit**.

|                      |                              |
|----------------------|------------------------------|
| <input type="text"/> | Eat a healthy diet           |
| <input type="text"/> | Exercise regularly           |
| <input type="text"/> | Lose weight                  |
| <input type="text"/> | Lower blood pressure         |
| <input type="text"/> | Lower cholesterol            |
| <input type="text"/> | Screen for colorectal cancer |
| <input type="text"/> | Screen for depression        |
| <input type="text"/> | Screen for diabetes          |
| <input type="text"/> | Screen for lung cancer       |
| <input type="text"/> | Screen for prostate cancer   |
| <input type="text"/> | Take aspirin daily           |
| <input type="text"/> | Quit smoking                 |



## Patient #2

**Now, suppose the same new patient presents for a 20-minute visit for a minor, acute illness. You have 5 minutes left over. As a reminder, he last saw a doctor 2 years ago and brings his labs from that visit.**

**45 y o black male, BMI 35, current smoker (30 pack-years), no significant past medical history. No current medications, never had any cancer screenings. Recently received a flu shot at his local pharmacy.**

**BP 150/90**

**Labs (TC 280, LDL 150, HDL 40)**

**Family history (1 first-degree relative diagnosed with colorectal cancer at age 50)**

\* 1. Still considering the same patient, how likely would you be to discuss these services at this visit?

|                              | Definitely <b>not</b> discuss this visit |                       |                       |                       |                       | Definitely discuss this visit |                       |                       |                       |                       |
|------------------------------|------------------------------------------|-----------------------|-----------------------|-----------------------|-----------------------|-------------------------------|-----------------------|-----------------------|-----------------------|-----------------------|
| Eat a healthy diet           | <input type="radio"/>                    | <input type="radio"/> | <input type="radio"/> | <input type="radio"/> | <input type="radio"/> | <input type="radio"/>         | <input type="radio"/> | <input type="radio"/> | <input type="radio"/> | <input type="radio"/> |
| Exercise regularly           | <input type="radio"/>                    | <input type="radio"/> | <input type="radio"/> | <input type="radio"/> | <input type="radio"/> | <input type="radio"/>         | <input type="radio"/> | <input type="radio"/> | <input type="radio"/> | <input type="radio"/> |
| Lose weight                  | <input type="radio"/>                    | <input type="radio"/> | <input type="radio"/> | <input type="radio"/> | <input type="radio"/> | <input type="radio"/>         | <input type="radio"/> | <input type="radio"/> | <input type="radio"/> | <input type="radio"/> |
| <input type="radio"/>        |                                          |                       |                       |                       |                       |                               |                       |                       |                       |                       |
| Lower blood pressure         | <input type="radio"/>                    | <input type="radio"/> | <input type="radio"/> | <input type="radio"/> | <input type="radio"/> | <input type="radio"/>         | <input type="radio"/> | <input type="radio"/> | <input type="radio"/> | <input type="radio"/> |
| <input type="radio"/>        |                                          |                       |                       |                       |                       |                               |                       |                       |                       |                       |
| Lower cholesterol            | <input type="radio"/>                    | <input type="radio"/> | <input type="radio"/> | <input type="radio"/> | <input type="radio"/> | <input type="radio"/>         | <input type="radio"/> | <input type="radio"/> | <input type="radio"/> | <input type="radio"/> |
| Screen for colorectal cancer | <input type="radio"/>                    | <input type="radio"/> | <input type="radio"/> | <input type="radio"/> | <input type="radio"/> | <input type="radio"/>         | <input type="radio"/> | <input type="radio"/> | <input type="radio"/> | <input type="radio"/> |
| Screen for depression        | <input type="radio"/>                    | <input type="radio"/> | <input type="radio"/> | <input type="radio"/> | <input type="radio"/> | <input type="radio"/>         | <input type="radio"/> | <input type="radio"/> | <input type="radio"/> | <input type="radio"/> |
| Screen for diabetes          | <input type="radio"/>                    | <input type="radio"/> | <input type="radio"/> | <input type="radio"/> | <input type="radio"/> | <input type="radio"/>         | <input type="radio"/> | <input type="radio"/> | <input type="radio"/> | <input type="radio"/> |
| <input type="radio"/>        |                                          |                       |                       |                       |                       |                               |                       |                       |                       |                       |
| Screen for lung cancer       | <input type="radio"/>                    | <input type="radio"/> | <input type="radio"/> | <input type="radio"/> | <input type="radio"/> | <input type="radio"/>         | <input type="radio"/> | <input type="radio"/> | <input type="radio"/> | <input type="radio"/> |
| Screen for prostate cancer   | <input type="radio"/>                    | <input type="radio"/> | <input type="radio"/> | <input type="radio"/> | <input type="radio"/> | <input type="radio"/>         | <input type="radio"/> | <input type="radio"/> | <input type="radio"/> | <input type="radio"/> |
| Quit smoking                 | <input type="radio"/>                    | <input type="radio"/> | <input type="radio"/> | <input type="radio"/> | <input type="radio"/> | <input type="radio"/>         | <input type="radio"/> | <input type="radio"/> | <input type="radio"/> | <input type="radio"/> |
| Take aspirin daily           | <input type="radio"/>                    | <input type="radio"/> | <input type="radio"/> | <input type="radio"/> | <input type="radio"/> | <input type="radio"/>         | <input type="radio"/> | <input type="radio"/> | <input type="radio"/> | <input type="radio"/> |
|                              | <input type="radio"/>                    | <input type="radio"/> | <input type="radio"/> | <input type="radio"/> | <input type="radio"/> | <input type="radio"/>         | <input type="radio"/> | <input type="radio"/> | <input type="radio"/> | <input type="radio"/> |

\* 2. Still considering a visit with **5 minutes left over**, in your opinion, which are the 3 most important services to address **in this visit?** (*Please select 3*)

Eat a healthy diet

Exercise regularly

Lose weight

Lower blood pressure

Lower cholesterol

Screen for colorectal cancer

Screen for depression

Screen for diabetes

Screen for lung cancer

Screen for prostate cancer

Take aspirin daily

Quit smoking

\* 3. Still considering a visit with **5 minutes left over**, please rank these services in order of importance **for this visit**.

|                      |                              |
|----------------------|------------------------------|
| <input type="text"/> | Eat a healthy diet           |
| <input type="text"/> | Exercise regularly           |
| <input type="text"/> | Lose weight                  |
| <input type="text"/> | Lower blood pressure         |
| <input type="text"/> | Lower cholesterol            |
| <input type="text"/> | Screen for colorectal cancer |
| <input type="text"/> | Screen for depression        |
| <input type="text"/> | Screen for diabetes          |
| <input type="text"/> | Screen for lung cancer       |
| <input type="text"/> | Screen for prostate cancer   |
| <input type="text"/> | Take aspirin daily           |
| <input type="text"/> | Quit smoking                 |

Thank you for completing this section! We are almost done.

## Physician Attitudes

Next, please tell us whether you agree or disagree with the following statements.

- \* In a routine office visit, I have enough time to address a patient's preventive care needs.

Strongly disagree Strongly agree



A horizontal scale with five radio buttons. The first button is selected. The scale is labeled 'Strongly disagree' on the left and 'Strongly agree' on the right.

- \* In an annual physical, I have enough time to address a patient's preventive care needs.

Strongly disagree Strongly agree



A horizontal scale with five radio buttons. The first button is selected. The scale is labeled 'Strongly disagree' on the left and 'Strongly agree' on the right.

- \* I am more likely to recommend a preventive care service if I think a patient will adhere to my recommendation.

Strongly disagree Strongly agree



A horizontal scale with five radio buttons. The first button is selected. The scale is labeled 'Strongly disagree' on the left and 'Strongly agree' on the right.

- \* In every visit, I discuss some, but not all, preventive care services in the health maintenance tab with my patients.

Strongly disagree Strongly agree



A horizontal scale with five radio buttons. The first button is selected. The scale is labeled 'Strongly disagree' on the left and 'Strongly agree' on the right.

- \* In every visit, I discuss ALL preventive care services in the health maintenance tab with my patients.

Strongly disagree Strongly agree



A horizontal scale with five radio buttons. The first button is selected. The scale is labeled 'Strongly disagree' on the left and 'Strongly agree' on the right.

## Prioritization

\* Please tell us whether you agree or disagree with the following statement:

**I prioritize which preventive care services I will discuss with my patients.**

Strongly disagree

Strongly agree

A horizontal Likert scale consisting of five radio buttons arranged in a row on a light gray background. The buttons are evenly spaced and are currently unselected.

\* Please tell us whether you agree or disagree with the following statement:

**I could use some guidance on how to prioritize preventive care services.**

Strongly disagree

Strongly agree



A horizontal scale with five radio buttons. The scale is a light gray bar with five white circles (radio buttons) spaced evenly along it. The first circle is on the left, and the last circle is on the right. The text 'Strongly disagree' is positioned above the first circle, and 'Strongly agree' is positioned above the last circle.

How important is each of the following when deciding which preventive care services you will discuss with your patients?

\* Patient interest

Not at all important Very important



\* Ability to help the patient live longer

Not at all important Very important



\* Strength of recommendation by professional organizations/guidelines

Not at all important Very important



\* Recommended in health maintenance tab

Not at all important Very important



\* Time required to discuss recommendation

Not at all important Very important



\* Probability that patient will adhere to recommendation

Not at all important Very important



\* Cost of the services



Not at all important

Very important

A horizontal grey bar containing five white radio buttons spaced evenly across its length.

\* Ability to improve the patient's quality of life

Not at all important

Very important

A horizontal grey bar containing five white radio buttons spaced evenly across its length.

Other important factors - please fill in (Optional)

## Physician Characteristics

**Below are the final questions in the survey.**

\* What is your gender?

\* What is your age?

\* How many years have you been in practice?

\* What is your clinical FTE? Please **do not** include time spent in other (e.g., administrative) capacities.

\* Do you practice in internal or family medicine?

\* What is your primary work location?

**In your own words, is there anything else you would like to share about how you provide preventive care for patients? (Optional)**

**eFigure 1. Number of Preventive Services Physicians Were Likely to Discuss ( $\geq 4$  of 5) During a 40-Minute or 20-Minute Office Visit**

- a) Patient 1
- b) Patient 2
- c) Patient 1, Difference between visit lengths
- d) Patient 2, Difference between visit lengths

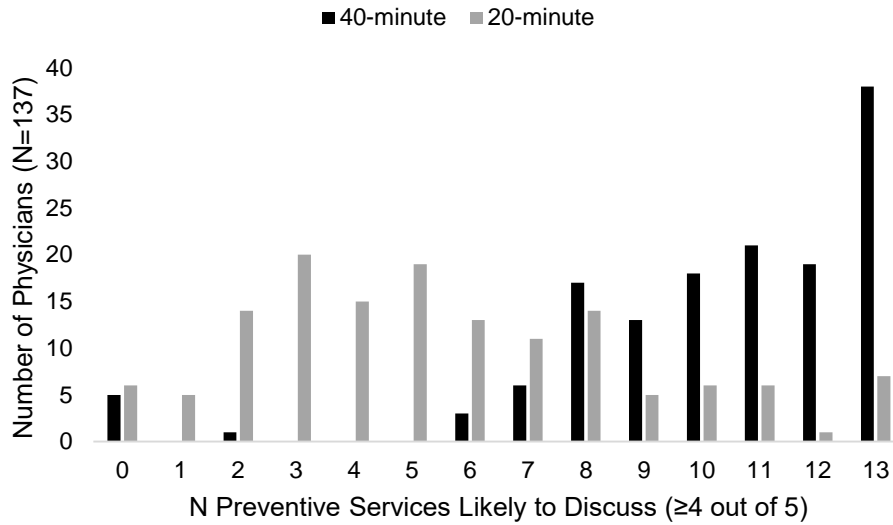

a)

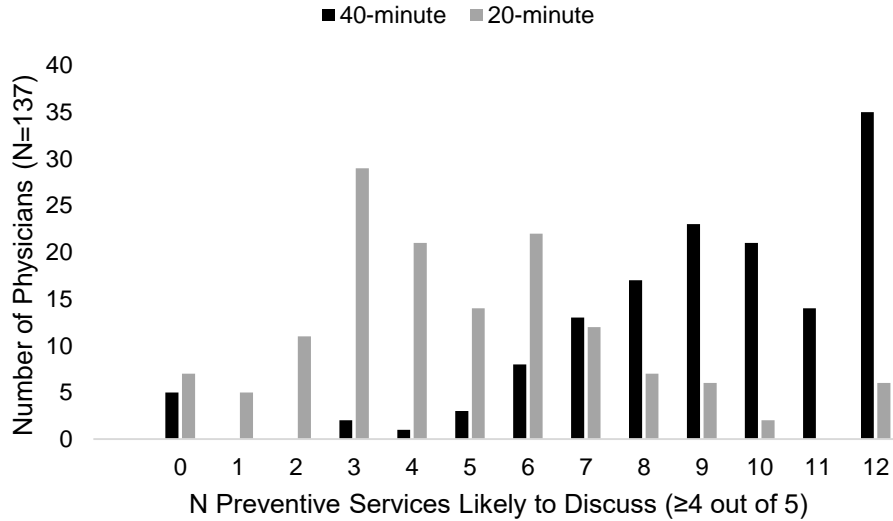

b)

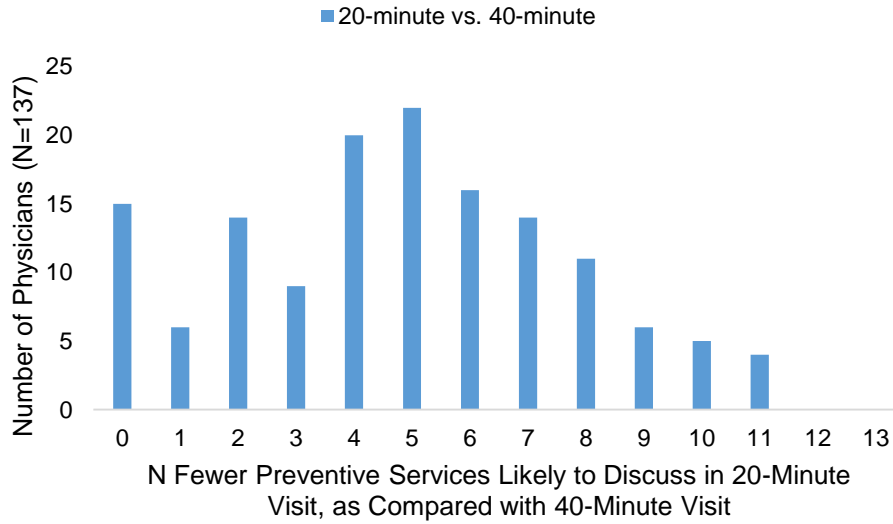

c)

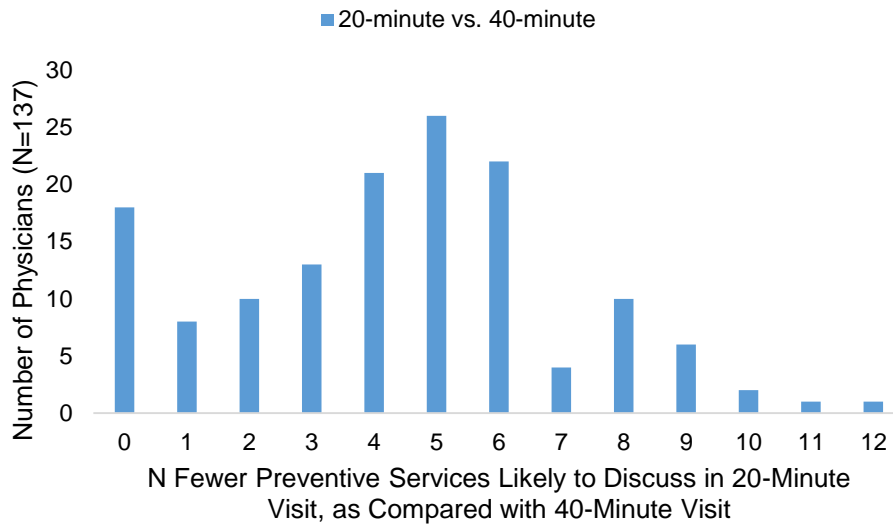

d)

**eFigure 2. Most Common Combinations of the Top 3 Preventive Recommendations to Address in the Current Visit (Chosen by >5% of Physicians)**

- a) Patient 1
- b) Patient 2

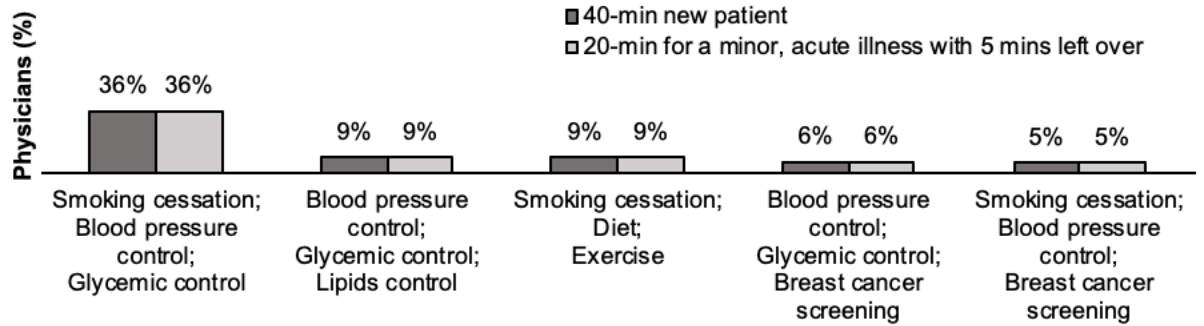

a)

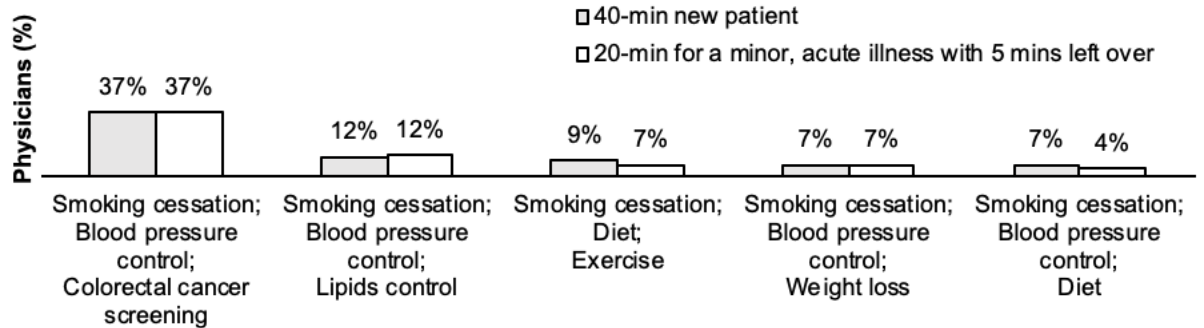

b)
